# Supplementary material for: Polyaromatic hydrocarbons (PAHs) sorption behavior unaffected by the presence of multi-walled carbon nanotubes (MWNTs) in a natural soil system
Source: Royal Society of Chemistry journal article supplement (doi:10.1039/c3em00099k), 2013-01-01
Supplement: c3em00099k.pdf [file c3em00099k.pdf]

**Polyaromatic hydrocarbons (PAHs) sorption behavior unaffected by the presence of multi-walled carbon nanotubes (MWNTs) in a natural soil system**

Shibin Li†<sup>\* a</sup>, Todd A. Anderson†, Micah J. Green‡, Jonathan D. Maul†, and  
Jaclyn E. Cañas-Carrell†

†Department of Environmental Toxicology, The Institute of Environmental and Human Health (TIEHH), Texas Tech University, Box 41163, Lubbock TX 79409-1163

‡Department of Chemical Engineering, Texas Tech University, Box 43121, Lubbock TX 79409-3121

*\* Corresponding author: li.shibin@epa.gov*

*<sup>a</sup> Present address: Office of Research and Development, Mid-Continent Ecology Division, National Health and Environmental Effects Research Laboratory, U.S. Environmental Protection Agency, Duluth, Minnesota, USA*

Table S1 shows Freundlich parameters and sorption coefficients for naphthalene in various sorbents.

Table S2 shows Freundlich parameters and sorption coefficients for fluorene in various sorbents.

Table S3 shows Percent desorption for PAHs in various sorbents.

Figure S1 shows Sorption behavior of naphthalene in various sorbents.

Figure S2 shows Sorption behavior of fluorene in various sorbents.

**Table S1.** Freundlich parameters and sorption coefficients for naphthalene in various sorbents. Data are presented as average ± standard deviation.

| Sorbent            | Freundlich equation |             |             | linear equation |              |             |
|--------------------|---------------------|-------------|-------------|-----------------|--------------|-------------|
|                    | $K_f^a$             | $1/n$       | $r^2$       | $K_d^b$         | Log $K_{oc}$ | $r^2$       |
| MWNTs              | 7573 ± 637          | 0.32 ± 0.04 | 0.85 ± 0.06 | 1833 ± 131      | 5.26 ± 0.03  | 0.86 ± 0.08 |
| Sand               | 0.31 ± 0.05         | 0.08 ± 0.05 | 0.05 ± 0.05 | 0.04 ± 0.01     | 1.55 ± 0.13  | 0.25 ± 0.18 |
| Sand + MWNTs       | 0.88 ± 0.02         | 0.20 ± 0.02 | 0.74 ± 0.19 | 0.07 ± 0.04     | 1.34 ± 0.24  | 0.50 ± 0.44 |
| Sandy loam         | NA                  | NA          | NA          | 1.84 ± 0.33     | 2.15 ± 0.08  | 0.79 ± 0.02 |
| Sandy loam + MWNTs | 4.64 ± 0.50         | 0.73 ± 0.08 | 0.45 ± 0.06 | 3.99 ± 0.15     | 2.42 ± 0.02  | 0.90 ± 0.08 |
| Silt loam          | 10.99 ± 0.94        | 0.81 ± 0.09 | 0.85 ± 0.03 | 7.80 ± 0.06     | 2.49 ± 0.00  | 0.96 ± 0.02 |
| Silt loam + MWNTs  | 16.01 ± 2.20        | 0.70 ± 0.04 | 0.79 ± 0.02 | 9.40 ± 0.70     | 2.54 ± 0.03  | 0.95 ± 0.05 |

<sup>a</sup>  $\mu\text{g}^{1-1/n} \text{mL}^{1/n} \text{g}^{-1}$

<sup>b</sup>  $\text{mLg}^{-1}$

NA = not available

**Table S2.** Freundlich parameters and sorption coefficients for fluorene in various sorbents. Data are presented as average ± standard deviation.

| Sorbent            | Freundlich equation |             |             | linear equation |              |             |
|--------------------|---------------------|-------------|-------------|-----------------|--------------|-------------|
|                    | $K_f^a$             | $1/n$       | $r^2$       | $K_d^b$         | Log $K_{oc}$ | $r^2$       |
| MWNTs              | 16450± 2843         | 0.33 ± 0.09 | 0.73 ± 0.09 | 14810 ± 1541    | 6.17± 0.05   | 0.92 ± 0.01 |
| Sand               | 0.60 ± 0.16         | 1.30 ± 0.40 | 0.97 ± 0.03 | 0.69 ± 0.03     | 2.84 ± 0.02  | 0.80 ± 0.25 |
| Sand + MWNTs       | 3.20 ± 0.57         | 0.56 ± 0.25 | 0.46± 0.13  | 3.71 ± 0.73     | 3.09 ± 0.08  | 0.60 ± 0.05 |
| Sandy loam         | 29.82 ± 3.37        | 0.79 ± 0.12 | 0.87 ± 0.06 | 20.07 ± 1.99    | 3.19 ± 0.04  | 0.84 ± 0.09 |
| Sandy loam + MWNTs | 48.88 ± 3.27        | 0.63 ± 0.09 | 0.95 ± 0.01 | 42.62 ± 6.40    | 3.45 ± 0.07  | 0.91 ± 0.06 |
| Silt loam          | 77.34 ±4.63         | 0.73 ± 0.03 | 0.95 ± 0.02 | 63.45 ± 4.38    | 3.40 ± 0.03  | 0.88 ± 0.04 |
| Silt loam + MWNTs  | 83.50 ± 8.84        | 0.65 ± 0.06 | 0.93± 0.04  | 77.43 ± 12.84   | 3.45± 0.07   | 0.86 ± 0.10 |

<sup>a</sup>  $\mu\text{g}^{1-1/n} \text{mL}^{1/n} \text{g}^{-1}$

<sup>b</sup>  $\text{mLg}^{-1}$

**Table S3.** Percent desorption for PAHs in various sorbents. Data are expressed as a percentage of the mass of adsorbed PAHs.

| Sorbent/ log $k_{ow}$ <sup>a</sup> | Naphthalene/3.29 | Fluorene/4.18 | Phenanthrene/4.45 |
|------------------------------------|------------------|---------------|-------------------|
| MWNTs                              | 7.6              | 6.8           | 3.5               |
| Sand                               | 0.0              | 7.0           | 3.3               |
| Sand + MWNTs                       | 2.1              | 4.7           | 3.9               |
| Sandy loam                         | 0.0              | 4.3           | 7.9               |
| Sandy loam + MWNTs                 | 0.0              | 3.0           | 7.4               |
| Silt loam                          | 0.0              | 1.5           | 6.6               |
| Silt loam + MWNTs                  | 0.0              | 1.3           | 0.0               |

<sup>a</sup> ATSDR, 2005. ATSDR's Toxicological Profiles on CD-ROM, CRC Press, Boca Raton, FL.

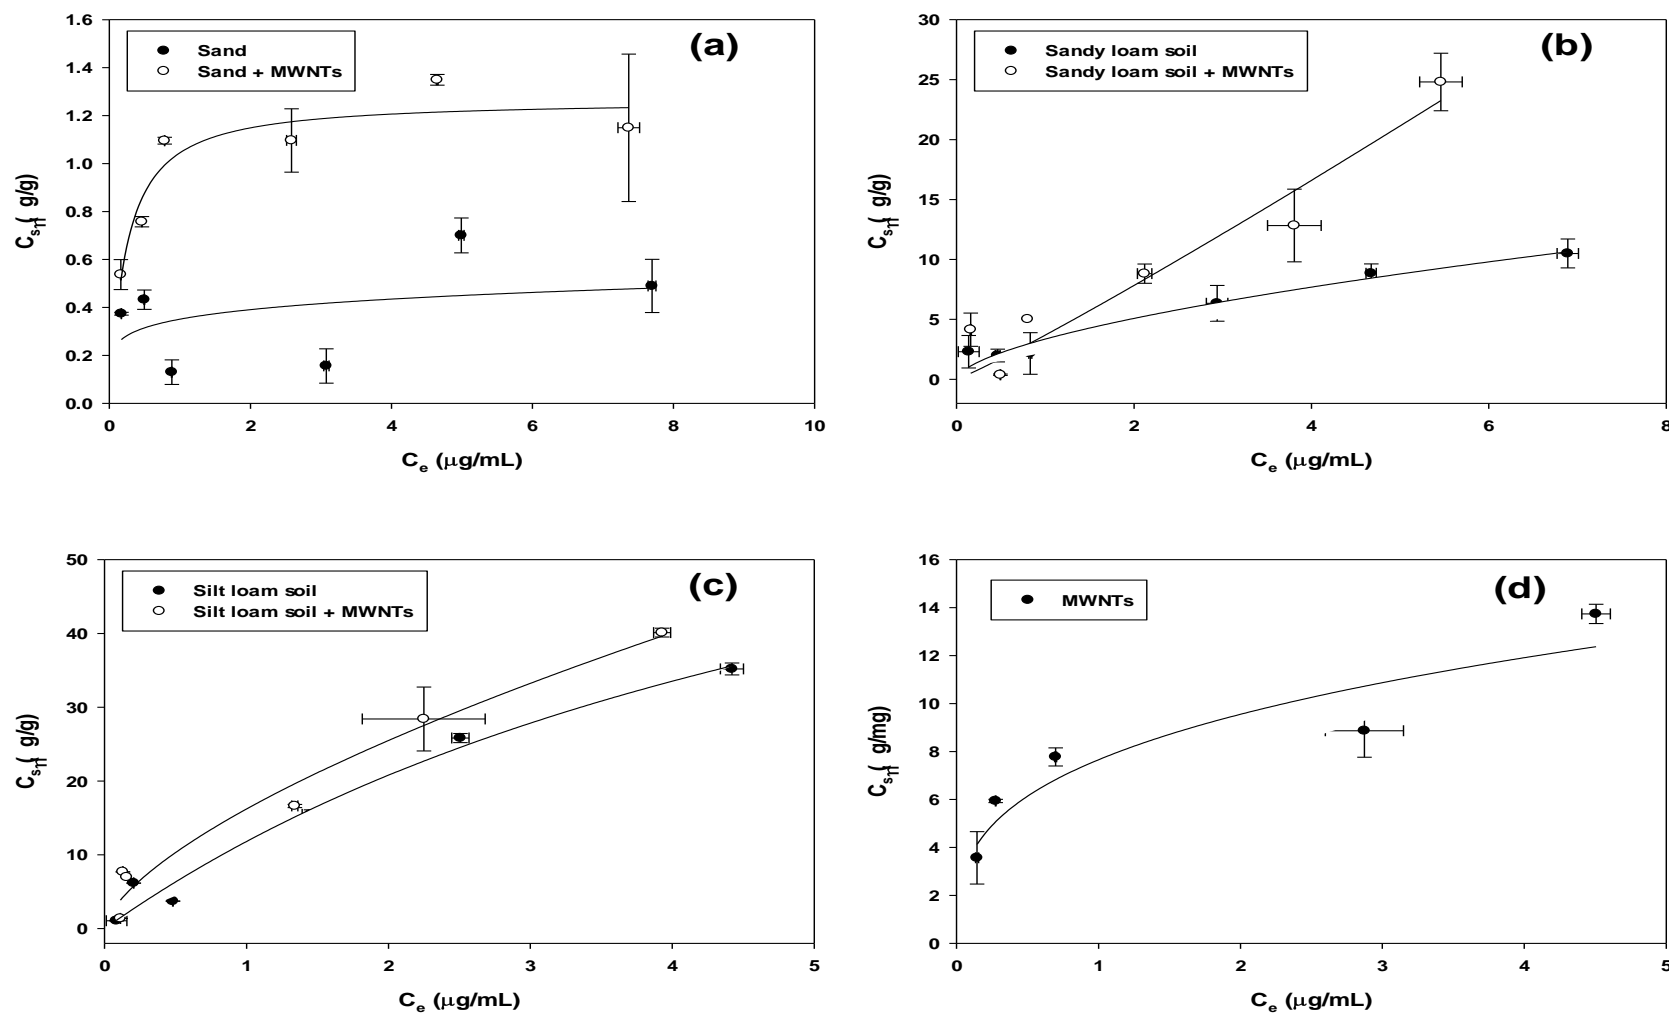

**Figure S1.** Sorption of naphthalene in (a) sand with or without addition of MWNTs, (b) sandy loam soil with or without addition of MWNTs, (c) silt loam soil with or without addition of MWNTs and (d) MWNTs. Data points represent means ( $n = 3$ ) and error bars for both solution and sorbent concentration indicate  $\pm 1$  standard deviation of the mean. The y axis unit is  $\mu\text{g/g}$  (except for MWNTs which is  $\mu\text{g/mg}$ ). Solid lines are the isotherms fitted by Freundlich equation.

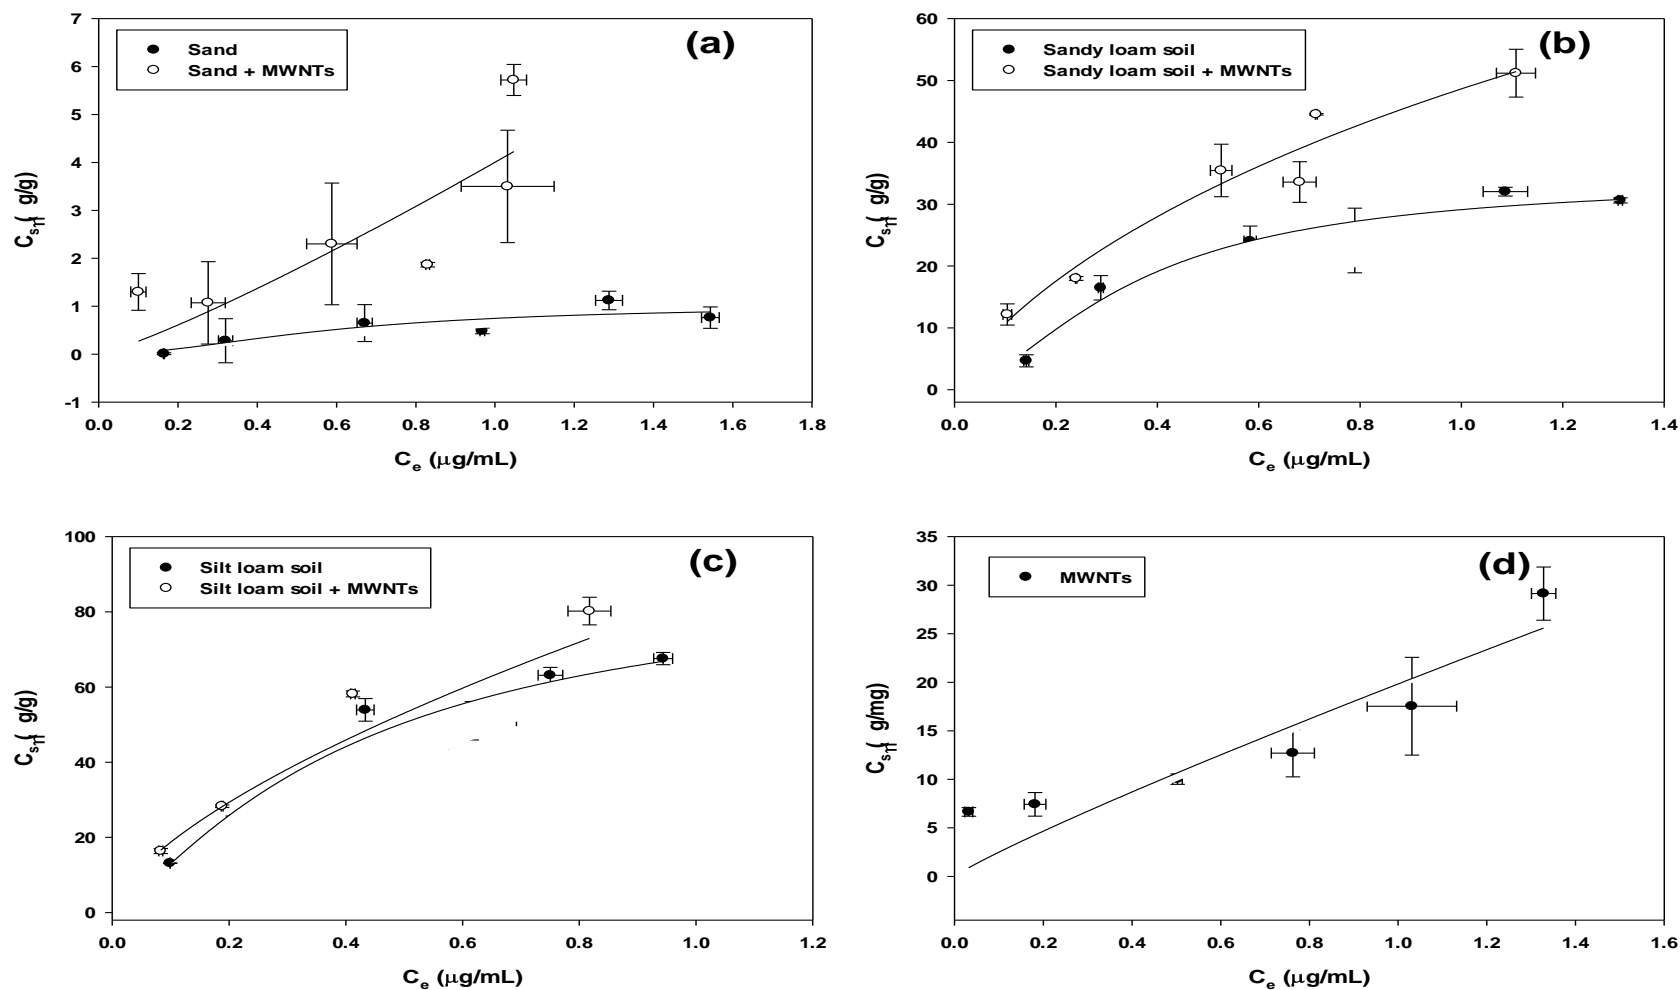

**Figure S2.** Sorption of fluorene in (a) sand with or without addition of MWNTs, (b) sandy loam soil with or without addition of MWNTs, (c) silt loam soil with or without addition of MWNTs and (d) MWNTs. Data points represent means ( $n = 3$ ) and error bars for both solution and sorbent concentration indicate  $\pm 1$  standard deviation of the mean. The y axis unit is  $\mu\text{g/g}$  (except for MWNTs which is  $\mu\text{g/mg}$ ). Solid lines are the isotherms fitted by Freundlich equation
